# Supplementary material for: Decision Support for IT Investment Projects
Source: Springer Nature journal article supplement (doi:10.1007/s12599-016-0423-7), 2016-03-08
Supplement: MOESM1 [file 7832824]

# **Decision Support for IT Investment Projects – A Real Option Analysis Approach Based on Relaxed Assumptions**

**Marcel Philipp Müller, Sebastian Stöckl, Steffen Zimmermann, Bernd Heinrich**

Bus Inf Syst Eng 58(6) (2016)

**Appendix (available online via <http://link.springer.com>)**

| <b>Author (Year)</b>          | <b>Journal/Book</b>                         | <b>Literature</b>   | <b>Knowledge</b>           | <b>Category of Option Pricing Model</b> |
|-------------------------------|---------------------------------------------|---------------------|----------------------------|-----------------------------------------|
| Angelou and Economides (2008) | IEEE Transactions on Engineering Management | IS                  | Descriptive & Prescriptive | Lattice/Tree                            |
| Balasubramanian et al. (2000) | Journal of Strategic Information Systems    | IS                  | Prescriptive               | Lattice/Tree                            |
| Bardhan et al. (2004)         | Journal of Management Information Systems   | IS                  | Descriptive & Prescriptive | Analytical, Lattice/Tree                |
| Benaroch and Kauffman (1999)  | Information Systems Research                | IS                  | Descriptive & Prescriptive | Analytical                              |
| Benaroch and Kauffman (2000)  | MIS Quarterly                               | IS                  | Descriptive & Prescriptive | Analytical                              |
| Benaroch et al. (2006)        | Journal of Management Information Systems   | IS                  | Descriptive & Prescriptive | Analytical, Lattice/Tree                |
| Black and Scholes (1973)      | Journal of Political Economy                | Finance & Economics | Descriptive                | Analytical                              |
| Blenman and Clark (2005)      | Review of Derivatives Research              | Finance & Economics | Prescriptive               | Analytical                              |
| Bollen (1999)                 | Management Science                          | IS                  | Descriptive                | Lattice/Tree                            |
| Brach (2003)                  | John Wiley & Sons                           | Finance & Economics | Descriptive                | Lattice/Tree                            |
| Brandimarte (2006)            | New Jersey: John Wiley and Sons             | Finance & Economics | Descriptive                | Numerical, Lattice/Tree, Simulation     |
| Brennan and Schwartz (1985)   | The Journal of Business                     | Finance & Economics | Prescriptive               | Analytical                              |
| Childs et al. (2001)          | Financial Management                        | Finance & Economics | Prescriptive               | Analytical                              |

|                                  |                                                          |                     |                            |            |
|----------------------------------|----------------------------------------------------------|---------------------|----------------------------|------------|
| Dias and Nunes (2011)            | International Conference on Real Options                 | Finance & Economics | Prescriptive               | Analytical |
| Diepold et al. (2011)            | Zeitschrift für Betriebswirtschaft                       | IS                  | Descriptive & Prescriptive | Analytical |
| Dixit and Pindyk (1994)          | Princeton University Press                               | Finance & Economics | Prescriptive               | Analytical |
| Dos Santos (1991)                | Journal of Management Information Systems                | IS                  | Descriptive & Prescriptive | Analytical |
| Elliott et al. (2007)            | Available at SSRN                                        | Finance & Economics | Prescriptive               | Analytical |
| Epstein et al. (1998)            | The Quarterly Review of Economics and Finance            | Finance & Economics | Prescriptive               | Analytical |
| Ewald and Wang (2010)            | Mathematical Social Sciences                             | Finance & Economics | Prescriptive               | Analytical |
| Ewald and Yang (2008)            | Mathematical Methods of Operations Research              | Finance & Economics | Descriptive & Prescriptive | Analytical |
| Guthrie (2007)                   | Journal of Financial and Quantitative Analysis           | Finance & Economics | Prescriptive               | Analytical |
| Heinrich et al. (2011)           | European Conference on Information Systems               | IS                  | Descriptive & Prescriptive | Analytical |
| Henderson (2004)                 | Princeton: Princeton University                          | Finance & Economics | Prescriptive               | Analytical |
| Henderson (2007)                 | Mathematics and Financial Economics                      | Finance & Economics | Prescriptive               | Analytical |
| Hilhorst et al. (2006)           | European Conference on Information Systems               | IS                  | Prescriptive               | Numerical  |
| Hubalek and Schachermayer (2001) | International Journal of Theoretical and Applied Finance | Finance & Economics | Descriptive                | Analytical |
| Hugonnier and Morellec (2007)    | Journal of Economic Dynamics and Control                 | Finance & Economics | Prescriptive               | Analytical |

|                            |                                                 |                     |                            |                                      |
|----------------------------|-------------------------------------------------|---------------------|----------------------------|--------------------------------------|
| Hull (2009)                | Upper Saddle River: Pearson Education Inc.      | Finance & Economics | Descriptive                | Analytical, Lattice/Tree, Simulation |
| Jaimungal et al. (2013)    | The European Journal of Finance                 | Finance & Economics | Prescriptive               | Analytical                           |
| Jeanblanc et al. (2009)    | Springer Finance                                | Finance & Economics | Descriptive                | Analytical                           |
| Ji (2010)                  | International Conference on Information Systems | IS                  | Descriptive                | Analytical                           |
| Kambil et al. (1991)       | Middletown: Idea Group Publishing               | IS                  | Descriptive                | Lattice/Tree                         |
| Kauffman and Kumar (2008)  | Information Technology Management               | IS                  | Descriptive & Prescriptive | Simulation                           |
| Klaus et al. (2014)        | European Conference on Information Systems      | IS                  | Prescriptive               | Analytical                           |
| Kumar (1996)               | Journal of Management Information Systems       | IS                  | Descriptive & Prescriptive | Analytical                           |
| Kumar (2002)               | Information & Management                        | IS                  | Descriptive & Prescriptive | Analytical                           |
| Kumar (2004)               | Journal of Management Information Systems       | IS                  | Prescriptive               | Analytical                           |
| Mahajan et al. (1990)      | Journal of Marketing                            | Finance & Economics | Descriptive                | Analytical, Lattice/Tree, Simulation |
| McDonald and Siegel (1986) | The Quarterly Journal of Economics              | Finance & Economics | Prescriptive               | Analytical                           |
| Merton (1998)              | The American Economic Review                    | Finance & Economics | Prescriptive               | Analytical                           |
| Metcalf and Hassett (1995) | Journal of Economic Dynamics and Control        | Finance & Economics | Descriptive & Prescriptive | Analytical                           |
| Myers and Majd (1990)      | Advances in Futures and Options Research        | Finance & Economics | Prescriptive               | Analytical                           |
| Pindyck (1993)             | Journal of Financial Economics                  | Finance & Economics | Prescriptive               | Analytical                           |

|                                      |                                                               |                     |                            |              |
|--------------------------------------|---------------------------------------------------------------|---------------------|----------------------------|--------------|
| Sarkar (2003)                        | Journal of Economic Dynamics and Control                      | Finance & Economics | Prescriptive               | Analytical   |
| Schwartz (1997)                      | The Journal of Finance                                        | Finance & Economics | Prescriptive               | Analytical   |
| Schwartz and Smith (2000)            | Management Science                                            | Finance & Economics | Prescriptive               | Analytical   |
| Schwartz and Zozaya-Gorostiza (2003) | Management Science                                            | IS                  | Descriptive & Prescriptive | Analytical   |
| Sick and Gamba (2010)                | Multinational Finance Journal                                 | Finance & Economics | Descriptive                | ---          |
| Smith and Nau (1995)                 | Management Science                                            | IS                  | Descriptive                | Lattice/Tree |
| Su et al. (2009)                     | Decision Sciences                                             | IS                  | Descriptive & Prescriptive | Analytical   |
| Taudes (1998)                        | Journal of Management Information Systems                     | IS                  | Descriptive & Prescriptive | Analytical   |
| Taudes et al. (2000)                 | MIS Quarterly                                                 | IS                  | Descriptive & Prescriptive | Analytical   |
| Tourinho (1979)                      | Working Paper Series,<br>University of California at Berkeley | Finance & Economics | Prescriptive               | Analytical   |
| Wu et al. (2009)                     | Annals of Operations Research                                 | IS                  | Prescriptive               | Lattice/Tree |

**Table Legend**

Classification of Option Pricing Models according to the Categories of Sick and Gamba (2010):

|                     |                                                                       |
|---------------------|-----------------------------------------------------------------------|
| <b>Analytical</b>   | Black Scholes Model, Margrabe Model, Stochastic Differential Equation |
| <b>Numerical</b>    | Numerical Approximation of Stochastic Differential Equation           |
| <b>Lattice/Tree</b> | Binomial Model, Decision Tree                                         |
| <b>Simulation</b>   | Monte Carlo Simulation                                                |
